# Supplementary material
Source: PubMed Central journal article supplement (PMC6016727)
Supplement: Supp_Fig1.pdf [file Supp_Fig1.pdf]

## Supplementary Data

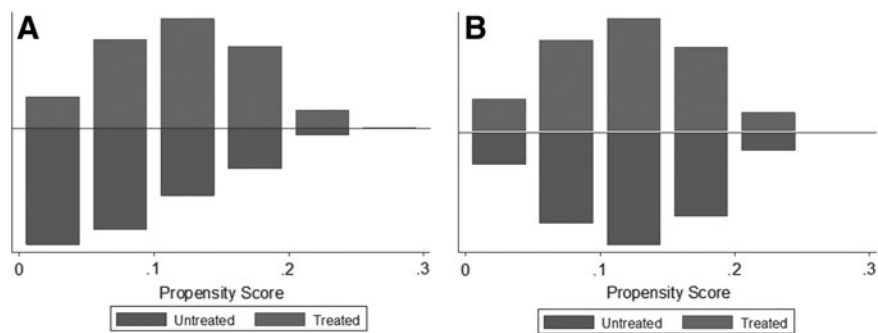

**SUPPLEMENTARY FIG. S1.** Comparison of propensity scores between patients who received a palliative care consultation during their inpatient admission and patients who did not. **(A)** Comparison of propensity scores before matching, **(B)** Comparison of propensity scores after matching. To match patients, propensity score was generated adjusting for patient age, sex, race, insurance status, income ZIP quartile, CCI, receipt of a major operation during the inpatient admission, hospital bed size, in-patient hospital length of stay, hospital region, hospital bed size, and hospital teaching status. A total of 22,364 patients who received a palliative care consultation during their inpatient admission were matched with 22,364 patients who did not use a 1:1 nearest neighbor matching method without replacement and using a caliper width of 0.10. Please see Supplementary Table S5 for comparison of balance between covariates before and after matching of patients. CCI, Charlson Comorbidity Index.
