# Supplementary material
Source: PubMed Central journal article supplement (PMC6016727)
Supplement: Supp_Table1.pdf [file Supp_Table1.pdf]

SUPPLEMENTARY TABLE S1. INTERNATIONAL  
CLASSIFICATION OF DISEASE, NINTH EDITION, CLINICAL  
MODIFICATION (ICD-9-CM) DIAGNOSIS CODES USED  
TO IDENTIFY PATIENTS WHO WERE ADMITTED  
FOR THE MANAGEMENT OF A PRIMARY  
GASTROINTESTINAL OR THORACIC MALIGNANCY

| <i>Description</i>                                                 | <i>ICD-9-CM<br/>diagnosis codes</i> |
|--------------------------------------------------------------------|-------------------------------------|
| Gastrointestinal cancers                                           | 150.x–159.x                         |
| Esophageal cancer                                                  | 150.0–150.9                         |
| Stomach cancer                                                     | 151.0–151.9                         |
| Cancers of the small intestine,<br>including the duodenum          | 152.0–152.9                         |
| Colon cancer                                                       | 153.0–153.9                         |
| Rectal cancer and cancers of the<br>rectosigmoid junction and anus | 154.0–154.8                         |
| Liver cancer and cancers of the<br>intrahepatic bile ducts         | 155.0–155.2                         |
| Gallbladder cancer and cancers of<br>the extrahepatic bile ducts   | 156.0–156.9                         |
| Pancreatic cancer                                                  | 157.0–157.9                         |
| Retroperitoneal and peritoneal cancers                             | 158.0–158.9                         |
| Other gastrointestinal cancers                                     | 159.0–159.9                         |
| Thoracic cancers                                                   | 162.x–164.x                         |
| Lung cancer and cancers of the<br>trachea and bronchus             | 162.0–162.9                         |
| Cancers arising from the pleura                                    | 163.0–163.9                         |
| Cancers of the thymus and other<br>mediastinal structures          | 164.0–164.9                         |
