# Supplementary material
Source: PubMed Central journal article supplement (PMC6016727)
Supplement: Supp_Table2.pdf [file Supp_Table2.pdf]

SUPPLEMENTARY TABLE S2. A COMPARISON OF PATIENT AND DISEASE CHARACTERISTICS BETWEEN PATIENTS WHO RECEIVED A PALLIATIVE CARE CONSULTATION DURING THEIR INPATIENT ADMISSION AND PATIENTS WHO DID NOT

| <i>Characteristic</i>    | <i>No palliative care<br/>N (%)</i> | <i>Palliative care<br/>N (%)</i> | <i>p value</i> | <i>Total<br/>N (%)</i> |
|--------------------------|-------------------------------------|----------------------------------|----------------|------------------------|
| Age group                |                                     |                                  | <0.001         |                        |
| 18–44 years              | 6971 (4.1)                          | 702 (3.3)                        |                | 7619 (4.0)             |
| 45–64 years              | 66,924 (39.7)                       | 7837 (36.3)                      |                | 74,761 (39.3)          |
| 65–74 years              | 50,655 (30.0)                       | 6059 (28.1)                      |                | 56,714 (29.8)          |
| >74 years                | 44,256 (26.2)                       | 6998 (32.4)                      |                | 51,254 (26.9)          |
| Sex                      |                                     |                                  | 0.577          |                        |
| Male                     | 93,798 (55.6)                       | 11,961 (55.4)                    |                | 105,759 (55.6)         |
| Female                   | 74,948 (44.4)                       | 9635 (44.6)                      |                | 84,583 (44.4)          |
| Race                     |                                     |                                  | <0.001         |                        |
| Caucasian                | 114,470 (71.2)                      | 14,326 (69.6)                    |                | 128,796 (71.0)         |
| African American         | 23,096 (14.4)                       | 2953 (14.3)                      |                | 26,049 (14.4)          |
| Hispanic                 | 12,999 (8.1)                        | 1768 (8.6)                       |                | 14,767 (8.1)           |
| Other                    | 10,316 (6.4)                        | 1551 (7.5)                       |                | 11,867 (6.5)           |
| Insurance                |                                     |                                  | <0.001         |                        |
| Private                  | 41,350 (24.6)                       | 5562 (25.9)                      |                | 46,912 (24.7)          |
| Medicare                 | 96,398 (57.2)                       | 11,446 (53.3)                    |                | 107,844 (56.8)         |
| Medicaid                 | 20,219 (12.0)                       | 2382 (11.1)                      |                | 22,601 (11.9)          |
| Other                    | 10,466 (6.2)                        | 2096 (9.8)                       |                | 12,562 (6.6)           |
| Income zip quartile      |                                     |                                  | <0.001         |                        |
| Q1                       | 49,689 (30.1)                       | 5927 (28.1)                      |                | 55,616 (29.9)          |
| Q2                       | 41,980 (25.5)                       | 5138 (24.3)                      |                | 47,118 (25.3)          |
| Q3                       | 39,148 (23.7)                       | 5150 (24.4)                      |                | 44,298 (23.8)          |
| Q4                       | 34,056 (20.7)                       | 4914 (23.3)                      |                | 38,970 (21.0)          |
| CCI                      |                                     |                                  | <0.001         |                        |
| CCI=2                    | 27,785 (16.5)                       | 2047 (9.5)                       |                | 29,832 (15.7)          |
| CCI=3–5                  | 53,731 (31.8)                       | 4520 (20.9)                      |                | 58,251 (30.6)          |
| CCI=6                    | 38,080 (22.6)                       | 6243 (28.9)                      |                | 44,323 (23.3)          |
| CCI >6                   | 49,156 (29.1)                       | 8786 (40.7)                      |                | 57,942 (30.4)          |
| Hospital location        |                                     |                                  | <0.001         |                        |
| South                    | 67,963 (40.3)                       | 8199 (38.0)                      |                | 76,162 (40.0)          |
| Midwest                  | 37,696 (22.3)                       | 4431 (20.5)                      |                | 42,127 (22.1)          |
| West                     | 28,214 (16.7)                       | 4714 (21.8)                      |                | 32,928 (17.3)          |
| Northeast                | 34,879 (20.7)                       | 4252 (19.7)                      |                | 39,131 (20.6)          |
| Hospital bed size        |                                     |                                  | <0.001         |                        |
| Small                    | 21,961 (13.0)                       | 2418 (11.2)                      |                | 24,379 (12.8)          |
| Medium                   | 42,074 (24.9)                       | 5421 (25.1)                      |                | 47,495 (25.0)          |
| Large                    | 104,717 (62.1)                      | 13,757 (63.7)                    |                | 118,474 (62.2)         |
| Hospital teaching status |                                     |                                  | <0.001         |                        |
| Rural                    | 20,058 (11.9)                       | 2114 (9.8)                       |                | 22,172 (11.7)          |
| Urban nonteaching        | 61,840 (36.7)                       | 7340 (34.0)                      |                | 69,180 (36.3)          |
| Urban teaching           | 86,854 (51.5)                       | 12,142 (56.2)                    |                | 98,996 (52.0)          |

Analysis presented here is for only patients who did not undergo a major operation during their inpatient admission as defined by the Agency for Healthcare Research and Quality (AHRQ) ( $n=168,752$ ).

CCI, Charlson Comorbidity Index.
