# Supplementary material
Source: PubMed Central journal article supplement (PMC6016727)
Supplement: Supp_Table3.pdf [file Supp_Table3.pdf]

SUPPLEMENTARY TABLE S3. A COMPARISON OF PATIENT AND DISEASE CHARACTERISTICS BETWEEN PATIENTS WHO RECEIVED A PALLIATIVE CARE CONSULTATION DURING THEIR INPATIENT ADMISSION AND PATIENTS WHO DID NOT

| <i>Characteristic</i>    | <i>No palliative care<br/>N (%)</i> | <i>Palliative care<br/>N (%)</i> | <i>p value</i> | <i>Total<br/>N (%)</i> |
|--------------------------|-------------------------------------|----------------------------------|----------------|------------------------|
| Age group                |                                     |                                  | <0.001         |                        |
| 18–44 years              | 4580 (5.1)                          | 114 (4.6)                        |                | 4694 (5.1)             |
| 45–64 years              | 37,325 (41.5)                       | 871 (34.8)                       |                | 38,196 (41.3)          |
| 65–74 years              | 27,935 (31.0)                       | 698 (27.9)                       |                | 28,633 (30.9)          |
| >74 years                | 20,207 (22.4)                       | 821 (32.8)                       |                | 21,028 (22.7)          |
| Sex                      |                                     |                                  | 0.803          |                        |
| Male                     | 48,990 (54.4)                       | 1356 (54.2)                      |                | 50,346 (54.4)          |
| Female                   | 41,056 (45.6)                       | 1148 (45.9)                      |                | 42,204 (45.6)          |
| Race                     |                                     |                                  | 0.012          |                        |
| Caucasian                | 63,894 (74.9)                       | 1715 (72.4)                      |                | 65,609 (74.8)          |
| African American         | 9398 (11.0)                         | 273 (11.5)                       |                | 9671 (11.0)            |
| Hispanic                 | 6029 (7.1)                          | 205 (8.7)                        |                | 6234 (7.1)             |
| Other                    | 6042 (7.1)                          | 175 (7.4)                        |                | 6217 (7.1)             |
| Insurance                |                                     |                                  | <0.001         |                        |
| Private                  | 30,612 (34.1)                       | 570 (22.8)                       |                | 31,182 (33.8)          |
| Medicare                 | 46,666 (51.9)                       | 1467 (58.6)                      |                | 48,133 (52.1)          |
| Medicaid                 | 7243 (8.1)                          | 301 (12.0)                       |                | 7544 (8.2)             |
| Other                    | 5361 (6.0)                          | 165 (6.6)                        |                | 5526 (6.0)             |
| Income zip quartile      |                                     |                                  | 0.698          |                        |
| Q1                       | 23,212 (26.3)                       | 668 (27.3)                       |                | 23,880 (26.3)          |
| Q2                       | 22,291 (25.3)                       | 603 (24.6)                       |                | 22,894 (25.3)          |
| Q3                       | 21,720 (24.6)                       | 607 (24.8)                       |                | 22,327 (24.6)          |
| Q4                       | 20,972 (23.8)                       | 572 (23.4)                       |                | 21,544 (23.8)          |
| CCI                      |                                     |                                  | <0.001         |                        |
| CCI=2                    | 27,192 (30.2)                       | 197 (7.9)                        |                | 27,389 (29.6)          |
| CCI=3–5                  | 28,568 (31.7)                       | 499 (19.9)                       |                | 29,067 (31.4)          |
| CCI=6                    | 18,198 (20.2)                       | 746 (29.8)                       |                | 18,944 (20.5)          |
| CCI >6                   | 16,089 (17.9)                       | 1062 (42.4)                      |                | 17,151 (18.5)          |
| Hospital location        |                                     |                                  | <0.001         |                        |
| South                    | 35,461 (39.4)                       | 909 (36.3)                       |                | 36,370 (39.3)          |
| Midwest                  | 19,868 (22.1)                       | 484 (19.3)                       |                | 20,352 (22.0)          |
| West                     | 16,580 (18.4)                       | 647 (25.8)                       |                | 17,227 (18.6)          |
| Northeast                | 18,138 (20.1)                       | 464 (18.5)                       |                | 18,602 (20.1)          |
| Hospital bed size        |                                     |                                  | 0.001          |                        |
| Small                    | 9176 (10.2)                         | 197 (7.8)                        |                | 9373 (10.1)            |
| Medium                   | 20,431 (22.7)                       | 594 (23.7)                       |                | 21,025 (22.7)          |
| Large                    | 60,440 (67.1)                       | 1713 (68.4)                      |                | 62,153 (67.2)          |
| Hospital teaching status |                                     |                                  | 0.087          |                        |
| Rural                    | 6170 (6.9)                          | 145 (5.8)                        |                | 6315 (6.8)             |
| Urban Nonteaching        | 27,792 (30.9)                       | 799 (31.9)                       |                | 28,591 (30.9)          |
| Urban Teaching           | 56,085 (62.3)                       | 1560 (62.3)                      |                | 57,645 (62.3)          |

Analysis presented here is for only patients who underwent a major operation during their inpatient admission as defined by the Agency for Healthcare Research and Quality (AHRQ) ( $n=90,047$ ).

CCI, Charlson Comorbidity Index.
